# Supplementary material for: An integrated pharmacokinetics ontology and corpus for text mining
Source: Springer Nature journal article supplement (doi:10.1186/1471-2105-14-35), 2013-02-01
Supplement: 12859_2011_5658_MOESM1_ESM.pdf [file 12859_2011_5658_MOESM1_ESM.pdf]

**Table S1 Clinical PK Studies**

| Ontology                    | Pharmacogenetics Trial       | Drug Interaction Trail                                                     |
|-----------------------------|------------------------------|----------------------------------------------------------------------------|
| Drugs = SOPHARM_20000       | Tamoxifen (TAM)              | Midazolam (MDZ, PO 4mg; IV 0.05mg/kg), Ketoconazole (KTZ, PO, 200, 400 mg) |
| Experiments                 |                              |                                                                            |
| in-vitro                    |                              |                                                                            |
| in-vivo                     | <i>in-vivo</i>               | <i>in-vivo</i>                                                             |
| Analysis_Method             |                              |                                                                            |
| Assay                       | HPLC/MS                      | HPLC/MS                                                                    |
| Dose                        | SOLTAMOX™, 20mg/day          | MDZ PO, IV; KTZ PO                                                         |
| Measurement                 | month 1, 4, 8, 12            | before and 0.5, 0.75, 1, 2, 4, 6, 9 hrs                                    |
| PK_Parameters               | TAM and its metabolites conc | MDZ and KTZ: AUC, AUCR, t <sub>1/2</sub> , and Cmax                        |
| Pre-dosing_Conditions       |                              |                                                                            |
| Sample                      |                              |                                                                            |
| Sample_Size                 | 298                          | 24                                                                         |
| Sample_Types                | Blood                        | blood                                                                      |
| Stratification              | prior chemo, menopausal      |                                                                            |
| Study_Design                |                              |                                                                            |
| Bioequivalence_Study        |                              |                                                                            |
| Dense_Sampling              |                              |                                                                            |
| Disease-Physiology_PK_Study |                              |                                                                            |
| Drug_Interaction_Study      |                              | inhibition                                                                 |
| Longitudinal                | Longitudinal                 | three-phase crossover                                                      |
| Pharmacogenetics_Study      | prospective, single arm      | prospective, single arm                                                    |
| Sparse_Sampling             |                              |                                                                            |
| Steady_State_Study          | steady state                 |                                                                            |
| Type_of_PK_Study            |                              |                                                                            |
| Metabolism                  |                              |                                                                            |
| CYP1_family                 |                              |                                                                            |
| CYP2_family                 | CYP2D6, 2C9, 2B6             |                                                                            |
| CYP3_family                 | CYP3A4/5                     | CYP3A4/5                                                                   |
| CYP4_family                 |                              |                                                                            |
| CYP_other_families          |                              |                                                                            |
| Subjects                    |                              |                                                                            |
| Disease = DOID_14974        | breast cancer                | healthy volunteers                                                         |
| Physiology = MP_0000001     |                              |                                                                            |
| Population = SOPHARM_52000  | Caucasian/African American   |                                                                            |
| Target                      | ESR1/ESR2                    |                                                                            |

Note: The annotations are aligned for each row. The left column is the ontology tree presentation. The central and right columns display their corresponding annotations from the paper.

**Table S2 *in vitro* PK Study**

| Ontology                       | in-vitro study                                        |
|--------------------------------|-------------------------------------------------------|
| ● Drugs ≡ SOPHARM_20000        | MDZ, APZ, TZ, CLAR, TAM, DTZ, NIF, BFC, HFC, TEST, E2 |
| ▼ ● Experiments                | Compare metabolic capabilities of CYP3A4, 3A5, 3A7    |
| ▼ ● in-vitro                   |                                                       |
| ▼ ● Experimental_Conditions    |                                                       |
| ▼ ● Buffer                     | sodium phosphate, NADPH, methanol.                    |
| ▼ ● NADPH_Source               |                                                       |
| ▼ ● Other_Information          |                                                       |
| ▼ ● Data_analysis_method       | WinNonlin                                             |
| ▼ ● Dilution                   | 4 fold, 10% methanol (TZ)                             |
| ▼ ● Incubation_time            | 5 min                                                 |
| ▼ ● Microsomal_binding         | insect cell (CYP3A)                                   |
| ▼ ● Number_of_replicates       | N/A                                                   |
| ▼ ● Preincubation_time         | 3min; 6 min                                           |
| ▼ ● Quantification_method      | HPLC, MS, Fluorimetry                                 |
| ▼ ● kdeg_or_ksyn_of_the_enzyme | CYP3A4/5/7, P450 reductase, b5                        |
| ▼ ● Protein                    | 1mol, 6.6mol, 9mol                                    |
| ▼ ● Protein_Concentration      | BD Gentest, PanVera, PanVera                          |
| ▼ ● Source                     |                                                       |
| ▼ ● Non_Recombinant-Enzymes    |                                                       |
| ▼ ● Recombinant_Enzymes        | CYP3A                                                 |
| ▼ ● Inhibitor_or_Inducer       |                                                       |
| ▼ ● Multi_Drug_Experiments     |                                                       |
| ▼ ● PK_Parameters              |                                                       |
| ▼ ● Emax                       |                                                       |
| ▼ ● IC50                       |                                                       |
| ▼ ● KI                         |                                                       |
| ▼ ● Ki                         |                                                       |
| ▼ ● Kinact                     |                                                       |
| ▼ ● Type_of_Interaction        |                                                       |
| ▼ ● Single_Drug_Experiments    |                                                       |
| ▼ ● PK_Parameters              |                                                       |
| ▼ ● CLint                      | CL for individual substrates                          |
| ▼ ● Km                         | Km for individual substrates                          |
| ▼ ● Vmax                       | Vmax for individual substrates                        |
| ▼ ● Substrate                  | MDZ, APZ, TZ, CLAR, TAM, DTZ, NIF, BFC, HFC, TEST, E2 |
| ▼ ● in-vivo                    |                                                       |
| ▼ ● Metabolism                 |                                                       |
| ▼ ● CYP1_family                |                                                       |
| ▼ ● CYP2_family                |                                                       |
| ▼ ● CYP3_family                | CYP3A4, 3A5, 3A7                                      |
| ▼ ● CYP4_family                |                                                       |
| ▼ ● CYP_4_families_other       |                                                       |

Note: The annotations are aligned for each row. The left column is the ontology tree presentation. The central and right columns display their corresponding annotations from the paper.
